# Supplementary figures and images for: Taxonomic Status and Diffusion Trend Prediction Under the Effect of Host Plant of the Urban Oligophagous Pest Histia rhodope
Source: Preprints.org preprint supplement (doi:10.20944/preprints202410.0503.v1), 2024-10-07

**Figure S1.** Secondary structures for tRNA genes from the mtDNA of *Histia rhodope*


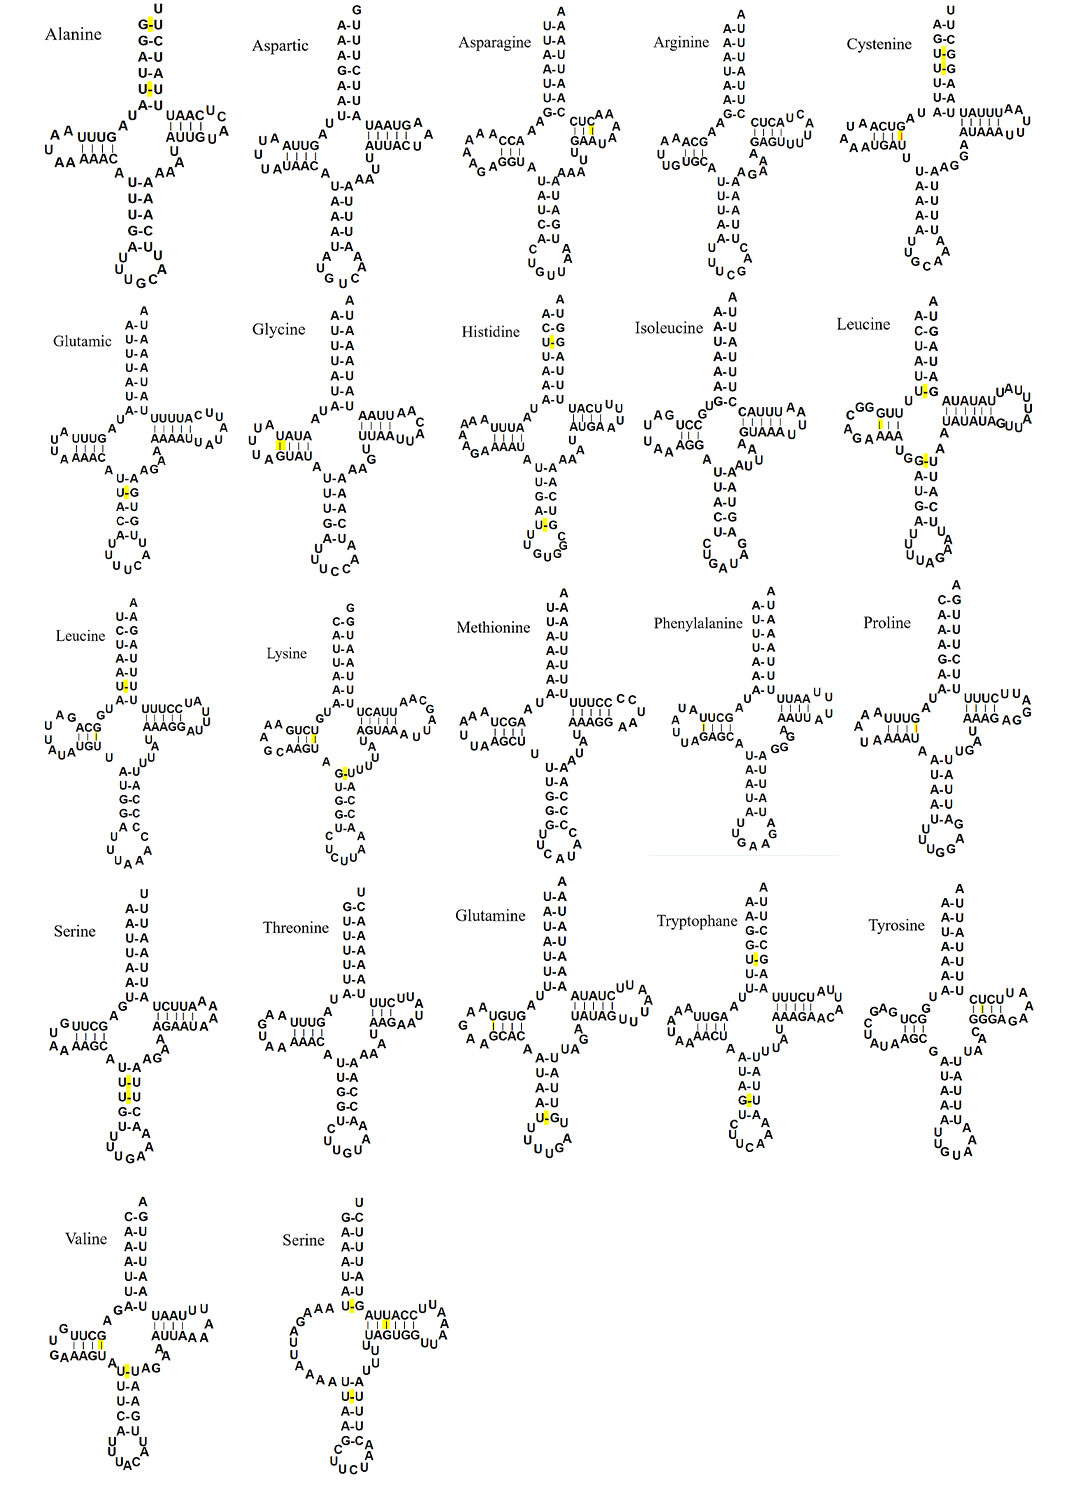

Supplement: Supplementary file 1 [file supplementary]
